# Supplementary material for: Equity in antenatal care quality: an analysis of 91 national household surveys
Source: PubMed Central journal article supplement (PMC6187112; doi:10.1016/s2214-109x(18)30389-9), 2018-10-12

# THE LANCET

## Global Health

### Supplementary appendix

This appendix formed part of the original submission and has been peer reviewed. We post it as supplied by the authors.

Supplement to: Arsenault C, Jordan K, Lee D, et al. Equity in antenatal care quality: an analysis of 91 national household surveys. *Lancet Glob Health* 2018; **6**: e1186–95.

# **Equity in antenatal care quality: an analysis of 91 national household surveys**

## **Supplementary material**

## Appendix 1. Definitions of skilled antenatal care providers by country

| Country                    | Survey type | Year | Skilled antenatal care providers                                                                                               |
|----------------------------|-------------|------|--------------------------------------------------------------------------------------------------------------------------------|
| Afghanistan                | DHS         | 2015 | Doctors, nurses/midwives, and auxiliary nurse/midwives                                                                         |
| Albania                    | DHS         | 2009 | Obstetrician/gynecologist, family doctor, and nurse, midwife.                                                                  |
| Algeria                    | MICS        | 2013 | Médecin, Infirmière / Sage-femme                                                                                               |
| Argentina                  | MICS        | 2012 | Médico, Enfermera, Técnica obstétrica / partera                                                                                |
| Armenia                    | DHS         | 2010 | Doctor, nurse, midwife, and feldsher.                                                                                          |
| Bangladesh                 | DHS         | 2014 | Qualified doctor, nurse/midwife/paramedic, FWV, CSBA, and SACMO                                                                |
| Belarus                    | MICS        | 2012 | Doctors, nurse/midwives, medical assistants                                                                                    |
| Belize                     | MICS        | 2011 | Doctor, Nurse / Midwife, Auxiliary midwife                                                                                     |
| Benin                      | DHS         | 2012 | Doctors, nurses, Midwives, Nursing Assistants and Midwife Assistants.                                                          |
| Bhutan                     | MICS        | 2010 | Doctor, Nurse / Midwife, HA/BHW, Asst. Clinical Officer (ACO)                                                                  |
| Bolivia                    | DHS         | 2008 | Doctor, nurse, auxiliary nurse                                                                                                 |
| Bosnia Herzegovina         | MICS        | 2012 | Doctor, Nurse / Midwife                                                                                                        |
| Burkina Faso               | DHS         | 2010 | Doctors, nurses, midwives, midwives, and trained midwives / birth attendants.                                                  |
| Burundi                    | DHS         | 2010 | Physicians, nurses and midwives are considered health providers.                                                               |
| Cambodia                   | DHS         | 2014 | Doctor, nurse, and midwife                                                                                                     |
| Cameroon                   | DHS         | 2011 | Doctors, nurses, midwives and nurses                                                                                           |
| Central African Rep        | MICS        | 2010 | Médecin, Infirmière / Sage-femme, Sage-femme auxiliaire                                                                        |
| Chad                       | DHS         | 2015 | Doctor, Nurse / Midwife, Matron and Hospital / Health Center Officer (this is "trained birth attendant")                       |
| Colombia                   | DHS         | 2015 | Doctor, Nurse                                                                                                                  |
| Comoros                    | DHS         | 2012 | Doctors, nurses and midwives.                                                                                                  |
| Congo                      | DHS         | 2012 | Doctors, nurses and midwives.                                                                                                  |
| Costa Rica                 | MICS        | 2011 | Médico general/obstetra, Enfermera general, Comadrona auxiliar, Enfermera obstétrica                                           |
| Cote d'Ivoire              | DHS         | 2012 | Doctors, nurses, midwives and midwives / nursing assistants.                                                                   |
| Dem. Republic of the Congo | DHS         | 2014 | Trained staff including doctors, nurses and birth attendants                                                                   |
| Dominican Republic         | DHS         | 2013 | Gynecologist / obstetrician, general practitioner, physician of another specialty, physician with unknown specialty and nurse. |
| Egypt                      | DHS         | 2014 | Doctor or nurse/midwife.                                                                                                       |
| El Salvador                | MICS        | 2014 | Médico, enfermera, enfermera auxiliar                                                                                          |
| Ethiopia                   | DHS         | 2016 | Doctors and nurses/midwives, health officers, and health extension workers                                                     |
| Gabon                      | DHS         | 2012 | Physicians, midwives, nurses, and nurse assistants are considered here as trained providers for antenatal care.                |
| Ghana                      | DHS         | 2014 | Doctor, nurse/midwife, and community health officer/nurse                                                                      |
| Guatemala                  | DHS         | 2015 | Doctor or nurse.                                                                                                               |
| Guinea                     | DHS         | 2012 | Doctors, nurses, midwives and midwives / nursing assistants.                                                                   |
| Guinea Bissau              | MICS        | 2014 | Médico Enfermeira/parreira                                                                                                     |
| Guyana                     | DHS         | 2009 | Doctor, nurse, midwife, auxiliary nurse/midwife, and medex.                                                                    |
| Haiti                      | DHS         | 2012 | Physicians, nurses, midwifery nurses and nurse assistants are considered here as trained providers.                            |
| Honduras                   | DHS         | 2012 | Doctor, nurse and auxiliary nurse                                                                                              |
| India                      | DHS         | 2016 | Doctor, anm/nurse/mid-wife/lhv                                                                                                 |
| Indonesia                  | DHS         | 2012 | Doctor, obstetrician, nurse, midwife, and village midwife.                                                                     |
| Iraq                       | MICS        | 2011 | Doctor public Doctor private Nurse / Midwife                                                                                   |
| Jamaica                    | MICS        | 2011 | Doctor Nurse / Midwife Auxiliary midwife                                                                                       |

|              |      |      |                                                                                                                                    |
|--------------|------|------|------------------------------------------------------------------------------------------------------------------------------------|
| Jordan       | DHS  | 2012 | Doctor, nurse, and midwife                                                                                                         |
| Kazakhstan   | MICS | 2015 | Doctor Nurse / Midwife Feldsher                                                                                                    |
| Kenya        | DHS  | 2014 | Doctor, nurse, and midwife                                                                                                         |
| Kosovo       | MICS | 2014 | Doctor Nurse / Midwife Auxiliary midwife                                                                                           |
| Kyrgyzstan   | DHS  | 2012 | Doctor, nurse, and midwife and feldsher.                                                                                           |
| Laos         | MICS | 2012 | Doctor Nurse / Midwife Auxiliary midwife                                                                                           |
| Lesotho      | DHS  | 2014 | Doctor, nurse, and midwife                                                                                                         |
| Liberia      | DHS  | 2013 | Doctor, nurse, and midwife and physician's assistant                                                                               |
| Macedonia    | MICS | 2011 | Doctor Midwife Obstetrical nurse                                                                                                   |
| Madagascar   | DHS  | 2009 | Doctor, nurse, medical assistant                                                                                                   |
| Malawi       | DHS  | 2016 | Doctors, clinical officers, medical assistants, nurses, and midwives.                                                              |
| Maldives     | DHS  | 2009 | Gynecologist, doctor, nurse, midwife, and community/family health worker                                                           |
| Mali         | DHS  | 2013 | Doctors, nurses, midwives and matrons.                                                                                             |
| Mauritania   | MICS | 2011 | Médecin, Sage-femme, Infirmière, Accoucheuse auxiliaire                                                                            |
| Mexico       | MICS | 2015 | Médico, Enfermera, Partera profesional técnica                                                                                     |
| Moldova      | MICS | 2012 | Doctor Nurse / Midwife                                                                                                             |
| Mongolia     | MICS | 2014 | Auxiliary midwife, Gynecologist Physician, Family/ Soum doctor Midwife Nurse                                                       |
| Montenegro   | MICS | 2013 | Doctor Nurse / Midwife Auxiliary midwife                                                                                           |
| Mozambique   | DHS  | 2011 | Qualified health care agent includes physician, nurse, midwife, and ward / midwife assistant                                       |
| Namibia      | DHS  | 2013 | Doctor, nurse, and midwife                                                                                                         |
| Nepal        | DHS  | 2011 | Doctor, nurse, and midwife                                                                                                         |
| Niger        | DHS  | 2012 | Doctor, nurse, and midwife                                                                                                         |
| Nigeria      | DHS  | 2013 | Doctor, nurse, midwife, and auxiliary nurse/midwife.                                                                               |
| Pakistan     | DHS  | 2013 | Doctor, nurse, midwife, and lady health visitor.                                                                                   |
| Palestine    | MICS | 2014 | Doctor Nurse / Midwife                                                                                                             |
| Panama       | MICS | 2013 | Médico, Enfermera, Auxiliar de Enfermera, Comadrona, Curandero/Hierbero, Médico Tradicional Indígena                               |
| Peru         | DHS  | 2012 | Doctor, nurse, and midwife                                                                                                         |
| Philippines  | DHS  | 2013 | Doctor, nurse, and midwife                                                                                                         |
| Rwanda       | DHS  | 2015 | Doctor, nurse, medical assistant, and midwife.                                                                                     |
| Saint Lucia  | MICS | 2012 | Doctor Nurse / Midwife                                                                                                             |
| Sao Tome     | MICS | 2014 | Doctor, nurse midwife, nurse, and nurse practitioner (auxiliary)                                                                   |
| Senegal      | DHS  | 2016 | Doctor, nurse, and midwife                                                                                                         |
| Serbia       | MICS | 2014 | Doctor Nurse / Midwife                                                                                                             |
| Sierra Leone | DHS  | 2013 | Doctor, nurse, midwife, and MCH Aide                                                                                               |
| South Sudan  | MICS | 2010 | Doctor, Midwife, Nurse / Midwife                                                                                                   |
| Sudan        | MICS | 2014 | Doctor Nurse / Midwife, Trained Midwife, Medical Assistant                                                                         |
| Suriname     | MICS | 2010 | Doctor Nurse / Midwife Auxiliary midwife                                                                                           |
| Swaziland    | DHS  | 2007 | Doctor, nurse/midwife/ auxiliary midwife                                                                                           |
| Tajikistan   | DHS  | 2012 | Doctor, nurse, midwife, and feldsher.                                                                                              |
| Tanzania     | DHS  | 2016 | Doctor/assistant medical officer (AMO), clinical officer, assistant clinical officer, nurse/midwife, assistant nurse, and MCH aide |
| Thailand     | MICS | 2013 | Doctor Nurse/midwife                                                                                                               |
| Timor Leste  | DHS  | 2010 | Doctor, nurse, midwife, and assistant nurse                                                                                        |
| Togo         | DHS  | 2014 | Doctors, medical assistants, nurses, midwives and auxiliary midwives                                                               |
| Tunisia      | MICS | 2012 | Médecin Infirmière / Sage-femme, Sage-femme auxiliaire                                                                             |
| Turkmenistan | MICS | 2016 | Doctor Nurse / Midwife Feldsher                                                                                                    |

|          |      |      |                                                               |
|----------|------|------|---------------------------------------------------------------|
| Uganda   | DHS  | 2011 | Doctor, nurse/midwife, and medical assistant/clinical officer |
| Ukraine  | DHS  | 2007 | Doctor, nurse, and midwife                                    |
| Vietnam  | MICS | 2014 | Doctor Nurse / Midwife                                        |
| Yemen    | DHS  | 2013 | Doctor, nurse, midwife, and auxiliary nurse/midwife           |
| Zambia   | DHS  | 2014 | Doctor, clinical officer, and nurse/midwife                   |
| Zimbabwe | DHS  | 2015 | Doctors, nurses and nurse/midwives                            |

---

## Appendix 2. Surveys questions on blood pressure monitoring, urine and blood testing and counseling on pregnancy complications during antenatal care

### DHS 5 and 6

- Did you see anyone for antenatal care for this pregnancy? (yes/no)
  - As part of your antenatal care during this pregnancy, were any of the following done at least once:
    - Was your blood pressure measured? (yes/no)
    - Did you give a urine sample? (yes/no)
    - Did you give a blood sample? (yes/no)

### DHS 6

- During any of your antenatal care visits, were you told about the signs of pregnancy complications? (yes/no)
- Were you told where to go if you had any of these complications? (yes/no)

### MICS

- Did you see anyone for antenatal care during your pregnancy with *(NAME)*? (yes/no)
  - As part of your antenatal care during this pregnancy, were any of the following done at least once:
    - Was your blood pressure measured? (yes/no)
    - Did you give a urine sample? (yes/no)
    - Did you give a blood sample? (yes/no)

### Appendix 3. Antenatal care coverage and wealth-related inequalities in 91 low and middle-income countries

| Country                    | Antenatal care coverage | 95% CI |      | Slope index of inequality in antenatal care coverage | 95% CI |      | Relative index inequality in antenatal care coverage | 95% CI |      |
|----------------------------|-------------------------|--------|------|------------------------------------------------------|--------|------|------------------------------------------------------|--------|------|
| Afghanistan                | 0.59                    | 0.58   | 0.59 | 0.32                                                 | 0.28   | 0.35 | 1.75                                                 | 1.62   | 1.87 |
| Albania                    | 0.97                    | 0.96   | 0.98 | 0.09                                                 | 0.05   | 0.14 | 1.11                                                 | 1.05   | 1.16 |
| Algeria                    | 0.93                    | 0.92   | 0.93 | 0.10                                                 | 0.07   | 0.13 | 1.12                                                 | 1.08   | 1.15 |
| Argentina                  | 0.98                    | 0.98   | 0.99 | 0.03                                                 | 0.01   | 0.05 | 1.03                                                 | 1.01   | 1.05 |
| Armenia                    | 0.99                    | 0.98   | 0.99 | -0.01                                                | -0.02  | 0.01 | 0.99                                                 | 0.98   | 1.01 |
| Bangladesh                 | 0.65                    | 0.64   | 0.67 | 0.61                                                 | 0.56   | 0.65 | 2.99                                                 | 2.61   | 3.38 |
| Belarus                    | 1.00                    | 0.99   | 1.00 | 0.03                                                 | -0.03  | 0.10 | 1.04                                                 | 0.96   | 1.11 |
| Belize                     | 0.96                    | 0.95   | 0.98 | 0.02                                                 | -0.03  | 0.07 | 1.02                                                 | 0.97   | 1.07 |
| Benin                      | 0.86                    | 0.85   | 0.87 | 0.38                                                 | 0.35   | 0.40 | 1.62                                                 | 1.55   | 1.69 |
| Bhutan                     | 0.97                    | 0.97   | 0.98 | 0.06                                                 | 0.03   | 0.09 | 1.06                                                 | 1.03   | 1.10 |
| Bolivia                    | 0.90                    | 0.89   | 0.91 | 0.25                                                 | 0.22   | 0.29 | 1.35                                                 | 1.28   | 1.41 |
| Bosnia Herzegovina         | 0.87                    | 0.84   | 0.89 | 0.01                                                 | -0.11  | 0.13 | 1.01                                                 | 0.87   | 1.15 |
| Burkina Faso               | 0.95                    | 0.95   | 0.96 | 0.12                                                 | 0.10   | 0.14 | 1.13                                                 | 1.11   | 1.16 |
| Burundi                    | 0.99                    | 0.99   | 0.99 | 0.01                                                 | -0.01  | 0.02 | 1.01                                                 | 0.99   | 1.02 |
| Cambodia                   | 0.95                    | 0.95   | 0.96 | 0.13                                                 | 0.10   | 0.16 | 1.15                                                 | 1.12   | 1.19 |
| Cameroon                   | 0.85                    | 0.84   | 0.86 | 0.54                                                 | 0.50   | 0.57 | 2.17                                                 | 2.01   | 2.34 |
| Central African Rep        | 0.68                    | 0.66   | 0.69 | 0.46                                                 | 0.41   | 0.51 | 2.05                                                 | 1.86   | 2.25 |
| Chad                       | 0.64                    | 0.63   | 0.65 | 0.22                                                 | 0.18   | 0.25 | 1.41                                                 | 1.33   | 1.49 |
| Colombia                   | 0.97                    | 0.97   | 0.98 | 0.13                                                 | 0.10   | 0.16 | 1.15                                                 | 1.11   | 1.19 |
| Comoros                    | 0.92                    | 0.91   | 0.94 | 0.11                                                 | 0.06   | 0.16 | 1.13                                                 | 1.06   | 1.20 |
| Congo                      | 0.93                    | 0.92   | 0.93 | 0.22                                                 | 0.19   | 0.25 | 1.29                                                 | 1.24   | 1.33 |
| Costa Rica                 | 0.98                    | 0.97   | 0.99 | 0.05                                                 | 0.00   | 0.10 | 1.05                                                 | 1.00   | 1.11 |
| Cote d'Ivoire              | 0.91                    | 0.90   | 0.92 | 0.23                                                 | 0.20   | 0.27 | 1.31                                                 | 1.25   | 1.38 |
| Dem. Republic of the Congo | 0.89                    | 0.88   | 0.89 | 0.22                                                 | 0.19   | 0.24 | 1.29                                                 | 1.24   | 1.33 |
| Dominican Republic         | 0.99                    | 0.99   | 1.00 | 0.04                                                 | 0.00   | 0.07 | 1.04                                                 | 1.00   | 1.07 |
| Egypt                      | 0.90                    | 0.90   | 0.91 | 0.15                                                 | 0.13   | 0.17 | 1.18                                                 | 1.15   | 1.22 |
| El Salvador                | 0.96                    | 0.95   | 0.97 | 0.07                                                 | 0.05   | 0.10 | 1.08                                                 | 1.05   | 1.11 |
| Ethiopia                   | 0.62                    | 0.61   | 0.63 | 0.41                                                 | 0.36   | 0.46 | 2.02                                                 | 1.82   | 2.21 |
| Gabon                      | 0.96                    | 0.95   | 0.97 | 0.16                                                 | 0.12   | 0.21 | 1.20                                                 | 1.14   | 1.26 |
| Ghana                      | 0.97                    | 0.97   | 0.98 | 0.09                                                 | 0.06   | 0.11 | 1.10                                                 | 1.07   | 1.12 |
| Guatemala                  | 0.96                    | 0.96   | 0.96 | 0.05                                                 | 0.03   | 0.06 | 1.05                                                 | 1.03   | 1.07 |
| Guinea                     | 0.86                    | 0.85   | 0.86 | 0.35                                                 | 0.31   | 0.38 | 1.55                                                 | 1.46   | 1.64 |
| Guinea Bissau              | 0.92                    | 0.91   | 0.93 | 0.12                                                 | 0.09   | 0.15 | 1.14                                                 | 1.10   | 1.18 |
| Guyana                     | 0.92                    | 0.91   | 0.94 | 0.30                                                 | 0.23   | 0.37 | 1.43                                                 | 1.28   | 1.58 |
| Haiti                      | 0.90                    | 0.90   | 0.91 | 0.19                                                 | 0.15   | 0.22 | 1.24                                                 | 1.18   | 1.29 |
| Honduras                   | 0.97                    | 0.96   | 0.97 | 0.06                                                 | 0.05   | 0.08 | 1.07                                                 | 1.05   | 1.09 |
| India                      | 0.79                    | 0.79   | 0.80 | 0.47                                                 | 0.46   | 0.48 | 1.95                                                 | 1.92   | 1.98 |
| Indonesia                  | 0.96                    | 0.96   | 0.96 | 0.19                                                 | 0.17   | 0.22 | 1.24                                                 | 1.20   | 1.28 |
| Iraq                       | 0.78                    | 0.77   | 0.78 | 0.35                                                 | 0.32   | 0.38 | 1.61                                                 | 1.53   | 1.68 |
| Jamaica                    | 0.98                    | 0.97   | 0.99 | 0.00                                                 | -0.05  | 0.06 | 1.00                                                 | 0.95   | 1.06 |
| Jordan                     | 0.99                    | 0.99   | 0.99 | 0.03                                                 | 0.01   | 0.05 | 1.03                                                 | 1.01   | 1.05 |
| Kazakhstan                 | 0.99                    | 0.99   | 1.00 | 0.00                                                 | -0.01  | 0.02 | 1.00                                                 | 0.99   | 1.02 |
| Kenya                      | 0.96                    | 0.96   | 0.96 | 0.13                                                 | 0.11   | 0.15 | 1.15                                                 | 1.12   | 1.17 |
| Kosovo                     | 0.98                    | 0.97   | 0.99 | 0.05                                                 | 0.00   | 0.11 | 1.06                                                 | 1.00   | 1.12 |
| Kyrgyzstan                 | 0.89                    | 0.88   | 0.90 | 0.27                                                 | 0.24   | 0.31 | 1.38                                                 | 1.32   | 1.45 |
| Laos                       | 0.54                    | 0.53   | 0.56 | 0.78                                                 | 0.75   | 0.81 | 5.47                                                 | 4.80   | 6.13 |
| Lesotho                    | 0.95                    | 0.94   | 0.96 | 0.09                                                 | 0.06   | 0.13 | 1.10                                                 | 1.06   | 1.14 |
| Liberia                    | 0.96                    | 0.95   | 0.97 | 0.10                                                 | 0.08   | 0.13 | 1.11                                                 | 1.08   | 1.14 |
| Macedonia                  | 0.99                    | 0.98   | 1.00 | 0.03                                                 | -0.01  | 0.07 | 1.03                                                 | 0.99   | 1.08 |
| Madagascar                 | 0.88                    | 0.87   | 0.89 | 0.30                                                 | 0.27   | 0.33 | 1.45                                                 | 1.39   | 1.51 |
| Malawi                     | 0.95                    | 0.94   | 0.95 | 0.04                                                 | 0.03   | 0.06 | 1.05                                                 | 1.03   | 1.06 |

|              |      |      |      |       |       |      |      |      |      |
|--------------|------|------|------|-------|-------|------|------|------|------|
| Maldives     | 1.00 | 0.99 | 1.00 | 0.02  | 0.01  | 0.04 | 1.03 | 1.01 | 1.04 |
| Mali         | 0.74 | 0.73 | 0.75 | 0.48  | 0.44  | 0.51 | 2.05 | 1.91 | 2.19 |
| Mauritania   | 0.85 | 0.84 | 0.87 | 0.31  | 0.26  | 0.35 | 1.46 | 1.37 | 1.54 |
| Mexico       | 0.98 | 0.98 | 0.99 | 0.05  | 0.02  | 0.07 | 1.05 | 1.02 | 1.08 |
| Moldova      | 0.99 | 0.98 | 1.00 | 0.03  | -0.02 | 0.08 | 1.03 | 0.98 | 1.08 |
| Mongolia     | 0.99 | 0.98 | 0.99 | 0.00  | -0.02 | 0.01 | 1.00 | 0.98 | 1.01 |
| Montenegro   | 0.92 | 0.89 | 0.94 | 0.15  | 0.05  | 0.26 | 1.18 | 1.04 | 1.33 |
| Mozambique   | 0.91 | 0.90 | 0.91 | 0.20  | 0.17  | 0.23 | 1.26 | 1.21 | 1.31 |
| Namibia      | 0.97 | 0.96 | 0.97 | 0.03  | 0.00  | 0.05 | 1.03 | 1.00 | 1.05 |
| Nepal        | 0.84 | 0.83 | 0.85 | 0.44  | 0.40  | 0.48 | 1.82 | 1.67 | 1.96 |
| Niger        | 0.83 | 0.82 | 0.84 | 0.28  | 0.25  | 0.32 | 1.43 | 1.36 | 1.50 |
| Nigeria      | 0.65 | 0.64 | 0.65 | 0.79  | 0.77  | 0.80 | 5.44 | 5.08 | 5.79 |
| Pakistan     | 0.73 | 0.72 | 0.74 | 0.58  | 0.54  | 0.61 | 2.54 | 2.29 | 2.78 |
| Palestine    | 0.99 | 0.99 | 1.00 | 0.00  | -0.01 | 0.01 | 1.00 | 0.99 | 1.01 |
| Panama       | 0.93 | 0.92 | 0.94 | 0.22  | 0.15  | 0.28 | 1.28 | 1.17 | 1.38 |
| Peru         | 0.98 | 0.97 | 0.98 | 0.10  | 0.08  | 0.12 | 1.11 | 1.08 | 1.14 |
| Philippines  | 0.96 | 0.95 | 0.96 | 0.15  | 0.12  | 0.18 | 1.18 | 1.14 | 1.22 |
| Rwanda       | 0.99 | 0.99 | 0.99 | 0.01  | 0.00  | 0.02 | 1.01 | 1.00 | 1.02 |
| Saint Lucia  | 0.97 | 0.93 | 1.00 | 0.10  | -0.09 | 0.29 | 1.11 | 0.88 | 1.34 |
| Sao Tome     | 0.97 | 0.96 | 0.99 | 0.06  | 0.02  | 0.11 | 1.07 | 1.02 | 1.12 |
| Senegal      | 0.99 | 0.99 | 0.99 | 0.01  | 0.00  | 0.02 | 1.01 | 1.00 | 1.02 |
| Serbia       | 0.98 | 0.98 | 0.99 | -0.05 | -0.19 | 0.09 | 0.95 | 0.81 | 1.09 |
| Sierra Leone | 0.98 | 0.97 | 0.98 | 0.03  | 0.02  | 0.04 | 1.03 | 1.02 | 1.05 |
| South Sudan  | 0.41 | 0.39 | 0.42 | 0.55  | 0.51  | 0.59 | 4.53 | 3.81 | 5.25 |
| Sudan        | 0.77 | 0.76 | 0.78 | 0.41  | 0.37  | 0.46 | 1.78 | 1.65 | 1.90 |
| Suriname     | 0.91 | 0.89 | 0.92 | 0.17  | 0.11  | 0.23 | 1.21 | 1.12 | 1.29 |
| Swaziland    | 0.97 | 0.97 | 0.98 | 0.06  | 0.03  | 0.09 | 1.07 | 1.03 | 1.10 |
| Tajikistan   | 0.79 | 0.78 | 0.81 | 0.30  | 0.25  | 0.35 | 1.48 | 1.37 | 1.60 |
| Tanzania     | 0.98 | 0.98 | 0.98 | 0.01  | 0.00  | 0.03 | 1.01 | 1.00 | 1.03 |
| Thailand     | 0.82 | 0.80 | 0.83 | 0.34  | 0.25  | 0.42 | 1.55 | 1.35 | 1.75 |
| Timor Leste  | 0.86 | 0.85 | 0.87 | 0.30  | 0.27  | 0.33 | 1.45 | 1.38 | 1.52 |
| Togo         | 0.73 | 0.72 | 0.74 | 0.61  | 0.58  | 0.64 | 2.79 | 2.56 | 3.01 |
| Tunisia      | 0.98 | 0.97 | 0.99 | 0.06  | 0.02  | 0.09 | 1.06 | 1.02 | 1.10 |
| Turkmenistan | 1.00 | 1.00 | 1.00 | 0.01  | -0.01 | 0.02 | 1.01 | 0.99 | 1.02 |
| Uganda       | 0.95 | 0.94 | 0.96 | 0.03  | 0.00  | 0.05 | 1.03 | 1.00 | 1.06 |
| Ukraine      | 0.99 | 0.99 | 1.00 | 0.02  | -0.01 | 0.04 | 1.02 | 0.99 | 1.04 |
| Vietnam      | 0.96 | 0.95 | 0.97 | 0.39  | 0.27  | 0.51 | 1.64 | 1.33 | 1.96 |
| Yemen        | 0.61 | 0.60 | 0.62 | 0.59  | 0.55  | 0.62 | 3.02 | 2.77 | 3.27 |
| Zambia       | 0.96 | 0.96 | 0.96 | 0.10  | 0.08  | 0.12 | 1.11 | 1.09 | 1.13 |
| Zimbabwe     | 0.93 | 0.93 | 0.94 | 0.10  | 0.07  | 0.13 | 1.11 | 1.08 | 1.15 |



#### Appendix 4. Antenatal care quality and wealth-related inequalities in 91 low and middle-income countries

| Country                    | Antenatal care quality | 95% CI |      | Slope index of inequality in antenatal care quality | 95% CI |      | Relative index of inequality in antenatal care quality | 95% CI |       |
|----------------------------|------------------------|--------|------|-----------------------------------------------------|--------|------|--------------------------------------------------------|--------|-------|
| Afghanistan                | 0.22                   | 0.21   | 0.23 | 0.23                                                | 0.18   | 0.27 | 3.06                                                   | 2.41   | 3.70  |
| Albania                    | 0.83                   | 0.81   | 0.85 | 0.41                                                | 0.33   | 0.49 | 1.74                                                   | 1.49   | 1.99  |
| Algeria                    | 0.73                   | 0.72   | 0.74 | 0.20                                                | 0.14   | 0.25 | 1.31                                                   | 1.21   | 1.41  |
| Argentina                  | 0.99                   | 0.98   | 0.99 | 0.02                                                | 0.01   | 0.04 | 1.02                                                   | 1.01   | 1.04  |
| Armenia                    | 1.00                   | 1.00   | 1.00 | 0.00                                                | 0.00   | 0.00 | 1.00                                                   | 1.00   | 1.00  |
| Bangladesh                 | 0.55                   | 0.53   | 0.57 | 0.59                                                | 0.53   | 0.65 | 3.87                                                   | 3.08   | 4.66  |
| Belarus                    | 1.00                   | 1.00   | 1.00 | 0.00                                                | 0.00   | 0.00 | 1.00                                                   | 1.00   | 1.00  |
| Belize                     | 0.99                   | 0.98   | 0.99 | 0.03                                                | -0.01  | 0.06 | 1.03                                                   | 0.99   | 1.06  |
| Benin                      | 0.80                   | 0.79   | 0.80 | 0.28                                                | 0.24   | 0.31 | 1.44                                                   | 1.37   | 1.51  |
| Bhutan                     | 0.90                   | 0.89   | 0.91 | 0.28                                                | 0.22   | 0.33 | 1.39                                                   | 1.28   | 1.49  |
| Bolivia                    | 0.67                   | 0.66   | 0.68 | 0.69                                                | 0.66   | 0.72 | 3.78                                                   | 3.36   | 4.21  |
| Bosnia Herzegovina         | 0.98                   | 0.97   | 0.99 | 0.05                                                | -0.05  | 0.14 | 1.05                                                   | 0.94   | 1.16  |
| Burkina Faso               | 0.60                   | 0.59   | 0.61 | 0.35                                                | 0.32   | 0.39 | 1.86                                                   | 1.74   | 1.98  |
| Burundi                    | 0.06                   | 0.06   | 0.07 | 0.15                                                | 0.11   | 0.18 | 11.15                                                  | 4.51   | 17.79 |
| Cambodia                   | 0.43                   | 0.42   | 0.45 | 0.16                                                | 0.10   | 0.21 | 1.45                                                   | 1.26   | 1.64  |
| Cameroon                   | 0.85                   | 0.84   | 0.86 | 0.53                                                | 0.48   | 0.57 | 2.15                                                   | 1.96   | 2.34  |
| Central African Rep        | 0.71                   | 0.69   | 0.73 | 0.22                                                | 0.15   | 0.29 | 1.37                                                   | 1.22   | 1.52  |
| Chad                       | 0.37                   | 0.36   | 0.38 | 0.37                                                | 0.33   | 0.42 | 3.01                                                   | 2.57   | 3.45  |
| Colombia                   | 0.96                   | 0.96   | 0.97 | 0.02                                                | 0.00   | 0.05 | 1.03                                                   | 1.00   | 1.05  |
| Comoros                    | 0.80                   | 0.78   | 0.82 | 0.36                                                | 0.28   | 0.44 | 1.62                                                   | 1.41   | 1.82  |
| Congo                      | 0.92                   | 0.92   | 0.93 | 0.33                                                | 0.29   | 0.37 | 1.50                                                   | 1.41   | 1.58  |
| Costa Rica                 | 0.95                   | 0.93   | 0.96 | -0.15                                               | -0.41  | 0.12 | 0.85                                                   | 0.58   | 1.12  |
| Cote d'Ivoire              | 0.67                   | 0.66   | 0.68 | 0.41                                                | 0.36   | 0.46 | 1.95                                                   | 1.75   | 2.14  |
| Dem. Republic of the Congo | 0.46                   | 0.45   | 0.47 | 0.56                                                | 0.52   | 0.59 | 4.14                                                   | 3.62   | 4.65  |
| Dominican Republic         | 0.98                   | 0.98   | 0.99 | 0.02                                                | 0.00   | 0.05 | 1.02                                                   | 1.00   | 1.05  |
| Egypt                      | 0.74                   | 0.73   | 0.75 | 0.30                                                | 0.26   | 0.33 | 1.52                                                   | 1.44   | 1.59  |
| El Salvador                | 0.97                   | 0.96   | 0.97 | 0.03                                                | 0.00   | 0.07 | 1.03                                                   | 1.00   | 1.07  |
| Ethiopia                   | 0.56                   | 0.54   | 0.57 | 0.41                                                | 0.35   | 0.48 | 2.28                                                   | 1.94   | 2.62  |
| Gabon                      | 0.95                   | 0.94   | 0.95 | 0.07                                                | 0.04   | 0.11 | 1.08                                                   | 1.04   | 1.12  |
| Ghana                      | 0.96                   | 0.96   | 0.97 | 0.13                                                | 0.10   | 0.16 | 1.15                                                   | 1.11   | 1.19  |
| Guatemala                  | 0.65                   | 0.64   | 0.66 | 0.61                                                | 0.59   | 0.64 | 3.04                                                   | 2.81   | 3.28  |
| Guinea                     | 0.52                   | 0.50   | 0.53 | 0.70                                                | 0.66   | 0.74 | 5.80                                                   | 4.81   | 6.78  |
| Guinea Bissau              | 0.81                   | 0.80   | 0.83 | 0.33                                                | 0.28   | 0.37 | 1.52                                                   | 1.42   | 1.62  |
| Guyana                     | 0.93                   | 0.92   | 0.95 | 0.23                                                | 0.13   | 0.33 | 1.30                                                   | 1.13   | 1.48  |
| Haiti                      | 0.80                   | 0.79   | 0.81 | 0.33                                                | 0.29   | 0.38 | 1.57                                                   | 1.46   | 1.67  |
| Honduras                   | 0.89                   | 0.88   | 0.90 | 0.28                                                | 0.25   | 0.31 | 1.40                                                   | 1.34   | 1.45  |
| India                      | 0.84                   | 0.83   | 0.84 | 0.41                                                | 0.40   | 0.42 | 1.74                                                   | 1.71   | 1.77  |
| Indonesia                  | 0.27                   | 0.26   | 0.28 | 0.16                                                | 0.12   | 0.19 | 1.81                                                   | 1.57   | 2.06  |
| Iraq                       | 0.83                   | 0.83   | 0.84 | 0.13                                                | 0.09   | 0.16 | 1.17                                                   | 1.12   | 1.22  |
| Jamaica                    | 0.99                   | 0.98   | 1.00 | -0.02                                               | -0.06  | 0.02 | 0.98                                                   | 0.94   | 1.02  |
| Jordan                     | 0.94                   | 0.93   | 0.94 | 0.05                                                | 0.01   | 0.08 | 1.05                                                   | 1.01   | 1.09  |
| Kazakhstan                 | 1.00                   | 1.00   | 1.00 | 0.00                                                | 0.00   | 0.01 | 1.00                                                   | 1.00   | 1.01  |
| Kenya                      | 0.85                   | 0.84   | 0.86 | 0.32                                                | 0.28   | 0.35 | 1.49                                                   | 1.41   | 1.56  |
| Kosovo                     | 0.83                   | 0.80   | 0.86 | 0.24                                                | 0.14   | 0.34 | 1.35                                                   | 1.17   | 1.52  |
| Kyrgyzstan                 | 0.25                   | 0.24   | 0.26 | 0.34                                                | 0.30   | 0.39 | 4.55                                                   | 3.46   | 5.65  |
| Laos                       | 0.33                   | 0.31   | 0.35 | 0.52                                                | 0.45   | 0.59 | 6.59                                                   | 4.47   | 8.71  |
| Lesotho                    | 0.80                   | 0.78   | 0.82 | 0.22                                                | 0.15   | 0.28 | 1.32                                                   | 1.21   | 1.43  |
| Liberia                    | 0.84                   | 0.83   | 0.85 | 0.34                                                | 0.30   | 0.38 | 1.54                                                   | 1.45   | 1.63  |
| Macedonia                  | 0.95                   | 0.94   | 0.97 | 0.07                                                | 0.00   | 0.15 | 1.08                                                   | 0.99   | 1.16  |
| Madagascar                 | 0.22                   | 0.21   | 0.23 | 0.54                                                | 0.50   | 0.57 | 20.80                                                  | 14.90  | 26.70 |
| Malawi                     | 0.30                   | 0.29   | 0.30 | 0.14                                                | 0.10   | 0.18 | 1.61                                                   | 1.41   | 1.81  |

|              |      |      |      |       |       |       |       |      |       |
|--------------|------|------|------|-------|-------|-------|-------|------|-------|
| Maldives     | 0.96 | 0.95 | 0.97 | 0.01  | -0.02 | 0.04  | 1.01  | 0.98 | 1.04  |
| Mali         | 0.43 | 0.42 | 0.45 | 0.58  | 0.54  | 0.62  | 5.29  | 4.36 | 6.22  |
| Mauritania   | 0.68 | 0.66 | 0.69 | 0.68  | 0.63  | 0.72  | 3.45  | 3.00 | 3.89  |
| Mexico       | 0.92 | 0.91 | 0.93 | 0.13  | 0.09  | 0.18  | 1.16  | 1.09 | 1.22  |
| Moldova      | 0.99 | 0.98 | 1.00 | -0.01 | -0.03 | 0.02  | 0.99  | 0.97 | 1.02  |
| Mongolia     | 0.95 | 0.94 | 0.96 | 0.10  | 0.06  | 0.13  | 1.11  | 1.07 | 1.15  |
| Montenegro   | 0.97 | 0.96 | 0.99 | 0.05  | -0.02 | 0.12  | 1.06  | 0.98 | 1.14  |
| Mozambique   | 0.39 | 0.37 | 0.40 | 0.26  | 0.22  | 0.31  | 2.03  | 1.75 | 2.30  |
| Namibia      | 0.94 | 0.93 | 0.94 | 0.09  | 0.06  | 0.13  | 1.10  | 1.06 | 1.15  |
| Nepal        | 0.43 | 0.41 | 0.44 | 0.71  | 0.67  | 0.75  | 9.57  | 7.32 | 11.83 |
| Niger        | 0.29 | 0.28 | 0.30 | 0.58  | 0.55  | 0.61  | 12.86 | 9.88 | 15.85 |
| Nigeria      | 0.78 | 0.77 | 0.79 | 0.60  | 0.57  | 0.63  | 2.75  | 2.54 | 2.96  |
| Pakistan     | 0.52 | 0.50 | 0.53 | 0.74  | 0.70  | 0.77  | 7.75  | 6.09 | 9.41  |
| Palestine    | 0.96 | 0.96 | 0.97 | -0.08 | -0.11 | -0.04 | 0.92  | 0.89 | 0.95  |
| Panama       | 0.93 | 0.91 | 0.94 | 0.15  | 0.08  | 0.22  | 1.18  | 1.09 | 1.28  |
| Peru         | 0.85 | 0.84 | 0.86 | 0.43  | 0.39  | 0.46  | 1.77  | 1.66 | 1.87  |
| Philippines  | 0.57 | 0.55 | 0.58 | 0.61  | 0.58  | 0.65  | 3.59  | 3.20 | 3.97  |
| Rwanda       | 0.53 | 0.52 | 0.55 | 0.22  | 0.17  | 0.26  | 1.51  | 1.38 | 1.65  |
| Saint Lucia  | 0.97 | 0.94 | 1.01 | 0.07  | -0.10 | 0.24  | 1.08  | 0.88 | 1.28  |
| Sao Tome     | 0.96 | 0.95 | 0.98 | 0.12  | 0.06  | 0.18  | 1.13  | 1.05 | 1.21  |
| Senegal      | 0.79 | 0.78 | 0.81 | 0.29  | 0.24  | 0.34  | 1.46  | 1.35 | 1.57  |
| Serbia       | 0.95 | 0.94 | 0.97 | 0.04  | -0.07 | 0.14  | 1.04  | 0.92 | 1.16  |
| Sierra Leone | 0.72 | 0.71 | 0.73 | 0.31  | 0.27  | 0.34  | 1.56  | 1.47 | 1.65  |
| South Sudan  | 0.29 | 0.27 | 0.31 | 0.29  | 0.22  | 0.36  | 3.24  | 2.07 | 4.41  |
| Sudan        | 0.79 | 0.78 | 0.80 | 0.44  | 0.39  | 0.49  | 1.86  | 1.70 | 2.02  |
| Suriname     | 0.95 | 0.94 | 0.97 | -0.04 | -0.09 | 0.01  | 0.96  | 0.91 | 1.01  |
| Swaziland    | 0.86 | 0.84 | 0.87 | 0.24  | 0.18  | 0.30  | 1.34  | 1.24 | 1.44  |
| Tajikistan   | 0.91 | 0.90 | 0.92 | 0.27  | 0.21  | 0.33  | 1.38  | 1.27 | 1.49  |
| Tanzania     | 0.52 | 0.51 | 0.54 | 0.63  | 0.60  | 0.67  | 4.18  | 3.69 | 4.68  |
| Thailand     | 0.99 | 0.99 | 1.00 | 0.00  | -0.02 | 0.01  | 1.00  | 0.98 | 1.01  |
| Timor Leste  | 0.09 | 0.08 | 0.10 | 0.06  | 0.02  | 0.09  | 1.89  | 1.18 | 2.60  |
| Togo         | 0.87 | 0.86 | 0.88 | 0.23  | 0.19  | 0.28  | 1.33  | 1.26 | 1.41  |
| Tunisia      | 0.91 | 0.90 | 0.93 | 0.02  | -0.04 | 0.09  | 1.03  | 0.95 | 1.10  |
| Turkmenistan | 0.99 | 0.99 | 1.00 | 0.01  | -0.01 | 0.02  | 1.01  | 0.99 | 1.02  |
| Uganda       | 0.18 | 0.17 | 0.19 | 0.27  | 0.22  | 0.32  | 4.87  | 3.39 | 6.36  |
| Ukraine      | 1.00 | 0.99 | 1.00 | -0.01 | -0.03 | 0.01  | 0.99  | 0.97 | 1.01  |
| Vietnam      | 0.59 | 0.56 | 0.61 | 0.56  | 0.48  | 0.64  | 2.95  | 2.35 | 3.55  |
| Yemen        | 0.70 | 0.69 | 0.71 | 0.13  | 0.08  | 0.18  | 1.20  | 1.11 | 1.30  |
| Zambia       | 0.42 | 0.41 | 0.43 | 0.53  | 0.50  | 0.57  | 4.28  | 3.78 | 4.77  |
| Zimbabwe     | 0.67 | 0.66 | 0.69 | 0.40  | 0.35  | 0.45  | 1.89  | 1.71 | 2.06  |

Antenatal care quality defined as the proportion of women who report blood pressure monitoring and urine and blood testing at any point during the pregnancy among those who had at least one visit with a skilled provider.

## Appendix 5. Educational-related inequalities in antenatal care quality in 91 low and middle-income countries

| Country                    | Slope index of inequality in antenatal care quality | 95% CI |      | Relative index of inequality in antenatal care quality | 95% CI |       |
|----------------------------|-----------------------------------------------------|--------|------|--------------------------------------------------------|--------|-------|
| Afghanistan                | 0.14                                                | 0.07   | 0.20 | 1.87                                                   | 1.31   | 2.43  |
| Albania                    | 0.34                                                | 0.24   | 0.45 | 1.57                                                   | 1.32   | 1.82  |
| Algeria                    | 0.14                                                | 0.09   | 0.20 | 1.22                                                   | 1.12   | 1.31  |
| Argentina                  | 0.03                                                | 0.00   | 0.05 | 1.03                                                   | 1.00   | 1.06  |
| Armenia                    | 0.00                                                | 0.00   | 0.00 | 1.00                                                   | 1.00   | 1.00  |
| Bangladesh                 | 0.39                                                | 0.31   | 0.47 | 2.19                                                   | 1.75   | 2.63  |
| Belarus                    | 0.00                                                | 0.00   | 0.00 | 1.00                                                   | 1.00   | 1.00  |
| Belize                     | 0.00                                                | -0.04  | 0.04 | 1.00                                                   | 0.96   | 1.04  |
| Benin                      | 0.26                                                | 0.22   | 0.31 | 1.41                                                   | 1.32   | 1.50  |
| Bhutan                     | 0.20                                                | 0.13   | 0.27 | 1.26                                                   | 1.15   | 1.37  |
| Bolivia                    | 0.56                                                | 0.51   | 0.60 | 2.64                                                   | 2.36   | 2.92  |
| Bosnia Herzegovina         | 0.05                                                | -0.06  | 0.17 | 1.06                                                   | 0.93   | 1.18  |
| Burkina Faso               | 0.42                                                | 0.37   | 0.47 | 2.12                                                   | 1.90   | 2.34  |
| Burundi                    | 0.15                                                | 0.12   | 0.18 | 11.41                                                  | 5.54   | 17.29 |
| Cambodia                   | 0.18                                                | 0.12   | 0.24 | 1.51                                                   | 1.30   | 1.72  |
| Cameroon                   | 0.51                                                | 0.46   | 0.55 | 2.07                                                   | 1.88   | 2.25  |
| Central African Rep        | 0.11                                                | 0.03   | 0.19 | 1.17                                                   | 1.03   | 1.30  |
| Chad                       | 0.14                                                | 0.09   | 0.20 | 1.49                                                   | 1.26   | 1.72  |
| Colombia                   | 0.02                                                | 0.00   | 0.04 | 1.02                                                   | 1.00   | 1.04  |
| Comoros                    | 0.27                                                | 0.18   | 0.36 | 1.42                                                   | 1.24   | 1.61  |
| Congo                      | 0.16                                                | 0.13   | 0.19 | 1.20                                                   | 1.15   | 1.24  |
| Costa Rica                 | -0.01                                               | -0.14  | 0.12 | 0.99                                                   | 0.85   | 1.12  |
| Cote d'Ivoire              | 0.22                                                | 0.16   | 0.29 | 1.40                                                   | 1.25   | 1.55  |
| Dem. Republic of the Congo | 0.42                                                | 0.38   | 0.46 | 2.71                                                   | 2.39   | 3.04  |
| Dominican Republic         | 0.04                                                | 0.01   | 0.06 | 1.04                                                   | 1.01   | 1.07  |
| Egypt                      | 0.22                                                | 0.19   | 0.26 | 1.36                                                   | 1.29   | 1.43  |
| El Salvador                | 0.03                                                | -0.01  | 0.07 | 1.03                                                   | 0.99   | 1.07  |
| Ethiopia                   | 0.44                                                | 0.37   | 0.50 | 2.39                                                   | 1.99   | 2.79  |
| Gabon                      | 0.05                                                | 0.01   | 0.09 | 1.06                                                   | 1.01   | 1.10  |
| Ghana                      | 0.09                                                | 0.06   | 0.12 | 1.10                                                   | 1.07   | 1.14  |
| Guatemala                  | 0.53                                                | 0.50   | 0.56 | 2.51                                                   | 2.32   | 2.70  |
| Guinea                     | 0.48                                                | 0.42   | 0.54 | 2.78                                                   | 2.32   | 3.24  |
| Guinea Bissau              | 0.24                                                | 0.19   | 0.29 | 1.35                                                   | 1.25   | 1.45  |
| Guyana                     | 0.12                                                | 0.05   | 0.20 | 1.15                                                   | 1.04   | 1.25  |
| Haiti                      | 0.30                                                | 0.25   | 0.35 | 1.48                                                   | 1.38   | 1.59  |
| Honduras                   | 0.27                                                | 0.24   | 0.30 | 1.38                                                   | 1.32   | 1.44  |
| India                      | 0.36                                                | 0.35   | 0.37 | 1.62                                                   | 1.59   | 1.64  |
| Indonesia                  | 0.11                                                | 0.07   | 0.15 | 1.51                                                   | 1.29   | 1.73  |
| Iraq                       | 0.09                                                | 0.05   | 0.14 | 1.12                                                   | 1.07   | 1.18  |
| Jamaica                    | 0.04                                                | 0.00   | 0.09 | 1.05                                                   | 1.00   | 1.09  |
| Jordan                     | 0.09                                                | 0.05   | 0.12 | 1.10                                                   | 1.05   | 1.14  |
| Kazakhstan                 | 0.00                                                | 0.00   | 0.01 | 1.00                                                   | 1.00   | 1.01  |
| Kenya                      | 0.28                                                | 0.25   | 0.32 | 1.42                                                   | 1.35   | 1.49  |
| Kosovo                     | 0.27                                                | 0.16   | 0.37 | 1.40                                                   | 1.19   | 1.60  |
| Kyrgyzstan                 | 0.28                                                | 0.23   | 0.32 | 3.23                                                   | 2.52   | 3.95  |
| Laos                       | 0.42                                                | 0.35   | 0.49 | 4.29                                                   | 2.99   | 5.58  |
| Lesotho                    | 0.20                                                | 0.14   | 0.26 | 1.29                                                   | 1.18   | 1.39  |

|              |       |       |      |      |       |       |
|--------------|-------|-------|------|------|-------|-------|
| Liberia      | 0.24  | 0.20  | 0.29 | 1.35 | 1.27  | 1.44  |
| Macedonia    | 0.10  | 0.01  | 0.18 | 1.11 | 1.01  | 1.22  |
| Madagascar   | 0.44  | 0.40  | 0.48 | 9.31 | 7.20  | 11.42 |
| Malawi       | 0.11  | 0.07  | 0.15 | 1.44 | 1.25  | 1.63  |
| Maldives     | 0.03  | 0.00  | 0.07 | 1.04 | 1.00  | 1.08  |
| Mali         | 0.44  | 0.38  | 0.50 | 3.03 | 2.49  | 3.57  |
| Mauritania   | 0.39  | 0.33  | 0.44 | 1.82 | 1.64  | 2.00  |
| Mexico       | 0.13  | 0.07  | 0.19 | 1.15 | 1.07  | 1.24  |
| Moldova      | 0.01  | -0.02 | 0.04 | 1.01 | 0.98  | 1.04  |
| Mongolia     | 0.09  | 0.05  | 0.12 | 1.09 | 1.05  | 1.14  |
| Montenegro   | 0.01  | -0.05 | 0.08 | 1.02 | 0.94  | 1.09  |
| Mozambique   | 0.26  | 0.22  | 0.31 | 2.02 | 1.75  | 2.30  |
| Namibia      | 0.06  | 0.03  | 0.10 | 1.07 | 1.03  | 1.11  |
| Nepal        | 0.50  | 0.44  | 0.56 | 3.79 | 3.01  | 4.57  |
| Niger        | 0.43  | 0.38  | 0.47 | 4.85 | 3.89  | 5.81  |
| Nigeria      | 0.41  | 0.38  | 0.44 | 1.83 | 1.72  | 1.93  |
| Pakistan     | 0.66  | 0.62  | 0.70 | 5.20 | 4.34  | 6.07  |
| Palestine    | 0.02  | -0.01 | 0.04 | 1.02 | 0.99  | 1.05  |
| Panama       | 0.18  | 0.10  | 0.27 | 1.23 | 1.10  | 1.35  |
| Peru         | 0.32  | 0.29  | 0.36 | 1.50 | 1.43  | 1.58  |
| Philippines  | 0.48  | 0.43  | 0.52 | 2.52 | 2.26  | 2.78  |
| Rwanda       | 0.21  | 0.16  | 0.25 | 1.48 | 1.34  | 1.62  |
| Saint Lucia  | 0.00  | 0.00  | 0.00 | 1.00 | 1.00  | 1.00  |
| Sao Tome     | 0.06  | 0.00  | 0.12 | 1.07 | 1.00  | 1.14  |
| Senegal      | 0.27  | 0.20  | 0.35 | 1.43 | 1.29  | 1.58  |
| Serbia       | -0.02 | -0.15 | 0.10 | 0.98 | 0.84  | 1.11  |
| Sierra Leone | 0.24  | 0.19  | 0.28 | 1.40 | 1.30  | 1.50  |
| South Sudan  | 0.18  | 0.09  | 0.27 | 1.94 | 1.26  | 2.61  |
| Sudan        | 0.40  | 0.35  | 0.45 | 1.74 | 1.59  | 1.88  |
| Suriname     | -0.05 | -0.12 | 0.02 | 0.95 | 0.88  | 1.02  |
| Swaziland    | 0.20  | 0.15  | 0.26 | 1.28 | 1.18  | 1.37  |
| Tajikistan   | 0.09  | 0.04  | 0.14 | 1.11 | 1.04  | 1.17  |
| Tanzania     | 0.47  | 0.43  | 0.51 | 2.65 | 2.36  | 2.94  |
| Thailand     | 0.01  | -0.02 | 0.03 | 1.01 | 0.98  | 1.03  |
| Timor Leste  | 0.06  | 0.03  | 0.09 | 1.98 | 1.22  | 2.73  |
| Togo         | 0.14  | 0.09  | 0.19 | 1.18 | 1.11  | 1.25  |
| Tunisia      | 0.01  | -0.06 | 0.08 | 1.01 | 0.93  | 1.09  |
| Turkmenistan | 0.50  | -0.19 | 1.20 | 2.01 | -0.81 | 4.83  |
| Uganda       | 0.28  | 0.23  | 0.33 | 5.04 | 3.59  | 6.49  |
| Ukraine      | 0.01  | 0.00  | 0.03 | 1.01 | 1.00  | 1.03  |
| Vietnam      | 0.42  | 0.33  | 0.51 | 2.20 | 1.74  | 2.66  |
| Yemen        | 0.09  | 0.04  | 0.14 | 2.20 | 1.74  | 2.66  |
| Zambia       | 0.38  | 0.34  | 0.42 | 2.66 | 2.36  | 2.96  |
| Zimbabwe     | 0.35  | 0.29  | 0.40 | 1.73 | 1.56  | 1.90  |

Antenatal care quality defined as the proportion of women who report blood pressure monitoring and urine and blood testing at any point during the pregnancy among those who had at least one visit with a skilled provider.

## Appendix 6. Antenatal care quality in the richest wealth quintile of 91 low and middle-income countries

| Country                    | Antenatal care quality |
|----------------------------|------------------------|
| Afghanistan                | 29.5                   |
| Albania                    | 97.6                   |
| Algeria                    | 78.1                   |
| Argentina                  | 99.7                   |
| Armenia                    | 100.0                  |
| Bangladesh                 | 77.1                   |
| Belarus                    | 100.0                  |
| Belize                     | 100.0                  |
| Benin                      | 92.9                   |
| Bhutan                     | 98.7                   |
| Bolivia                    | 90.5                   |
| Bosnia Herzegovina         | 98.1                   |
| Burkina Faso               | 82.6                   |
| Burundi                    | 17.6                   |
| Cambodia                   | 52.9                   |
| Cameroon                   | 96.2                   |
| Central African Rep        | 79.6                   |
| Chad                       | 59.5                   |
| Colombia                   | 97.1                   |
| Comoros                    | 90.9                   |
| Congo                      | 98.7                   |
| Costa Rica                 | 82.4                   |
| Cote d'Ivoire              | 84.4                   |
| Dem. Republic of the Congo | 81.8                   |
| Dominican Republic         | 98.5                   |
| Egypt                      | 88.2                   |
| El Salvador                | 97.9                   |
| Ethiopia                   | 80.0                   |
| Gabon                      | 96.7                   |
| Ghana                      | 99.4                   |
| Guatemala                  | 92.0                   |
| Guinea                     | 87.7                   |
| Guinea Bissau              | 96.5                   |
| Guyana                     | 100.0                  |
| Haiti                      | 94.2                   |
| Honduras                   | 97.1                   |
| India                      | 95.1                   |
| Indonesia                  | 33.2                   |
| Iraq                       | 87.4                   |
| Jamaica                    | 100.0                  |
| Jordan                     | 96.6                   |
| Kazakhstan                 | 100.0                  |
| Kenya                      | 96.9                   |
| Kosovo                     | 92.7                   |
| Kyrgyzstan                 | 49.1                   |
| Laos                       | 55.6                   |
| Lesotho                    | 88.5                   |
| Liberia                    | 96.0                   |
| Macedonia                  | 95.6                   |
| Madagascar                 | 61.7                   |
| Malawi                     | 39.4                   |
| Maldives                   | 95.8                   |
| Mali                       | 73.5                   |

|              |       |
|--------------|-------|
| Mauritania   | 90.0  |
| Mexico       | 95.8  |
| Moldova      | 98.5  |
| Mongolia     | 97.7  |
| Montenegro   | 99.1  |
| Mozambique   | 58.5  |
| Namibia      | 96.0  |
| Nepal        | 77.1  |
| Niger        | 65.3  |
| Nigeria      | 92.9  |
| Pakistan     | 83.4  |
| Palestine    | 93.5  |
| Panama       | 97.2  |
| Peru         | 96.6  |
| Philippines  | 82.7  |
| Rwanda       | 71.7  |
| Saint Lucia  | 100.0 |
| Sao Tome     | 100.0 |
| Senegal      | 92.1  |
| Serbia       | 93.7  |
| Sierra Leone | 88.2  |
| South Sudan  | 40.3  |
| Sudan        | 95.5  |
| Suriname     | 96.3  |
| Swaziland    | 93.1  |
| Tajikistan   | 97.9  |
| Tanzania     | 85.9  |
| Thailand     | 98.8  |
| Timor Leste  | 11.7  |
| Togo         | 96.0  |
| Tunisia      | 94.1  |
| Turkmenistan | 99.6  |
| Uganda       | 35.6  |
| Ukraine      | 99.1  |
| Vietnam      | 82.5  |
| Yemen        | 76.9  |
| Zambia       | 68.9  |
| Zimbabwe     | 82.7  |

---

Antenatal care quality defined as the proportion of women who report blood pressure monitoring and urine and blood testing at any point during the pregnancy among those who had at least one visit with a skilled provider.

**Appendix 7. Antenatal care coverage and quality (measured by three and four items) by GDP per capita in 55 low and middle-income countries**

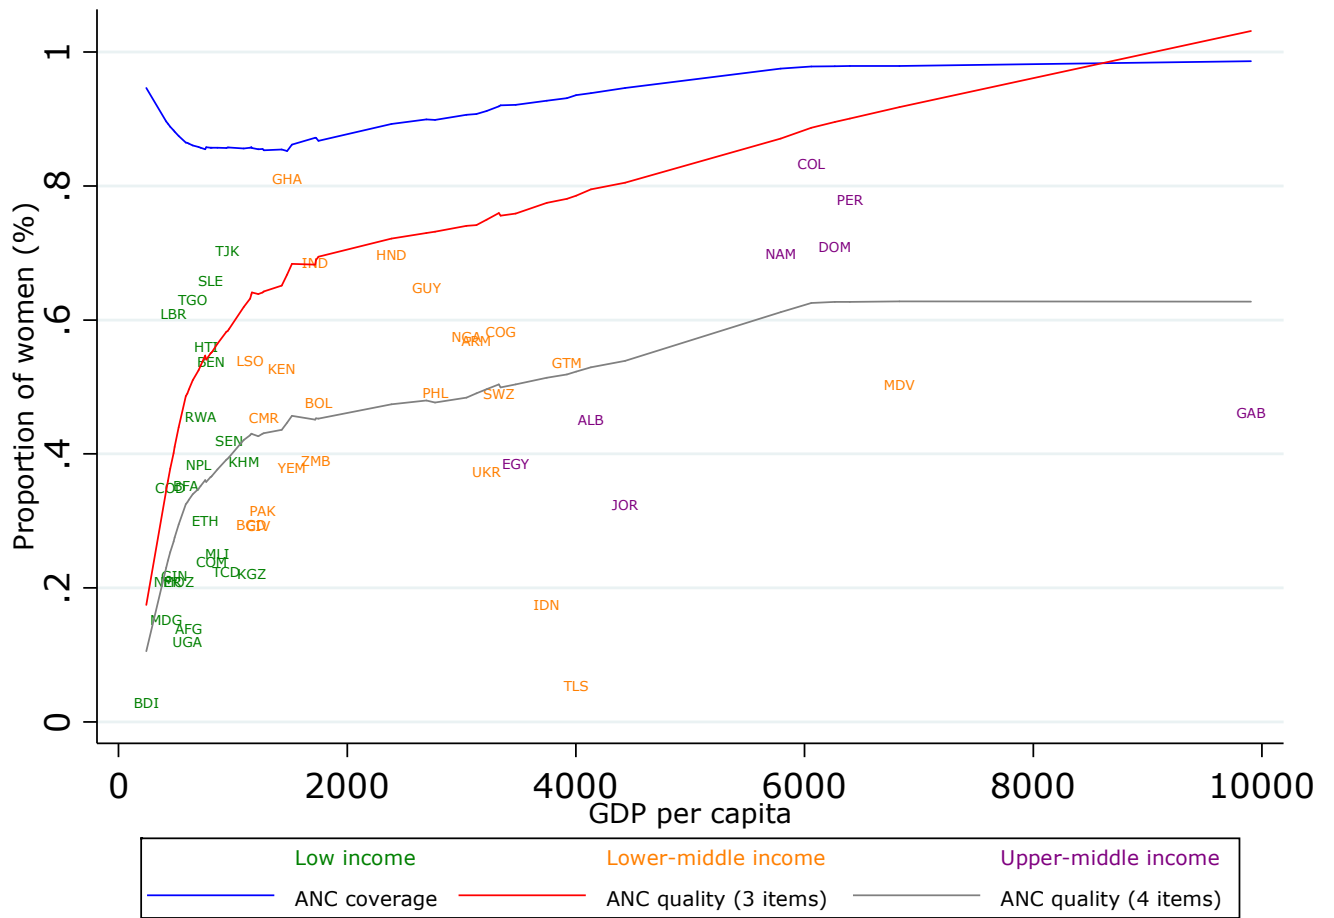

Supplement: mmc1.pdf [file mmc1.pdf]
